# Supplementary material for: Association Between Community‐Level Violent Crime and Cardiovascular Mortality in Chicago: A Longitudinal Analysis
Source: PubMed Central journal article supplement — J Am Heart Assoc. 2022 Jul 14;11(14):e025168. doi: 10.1161/JAHA.122.025168 (PMC9707824; doi:10.1161/jaha.122.025168), 2022-07-14
Supplement: JAH3-11-e025168-s001.pdf [file JAH3-11-e025168-s001.pdf]

## **SUPPLEMENTAL MATERIAL**

**Table S1. Hausman-Taylor estimator – Outcome: Age-adjusted cardiovascular mortality rate (log transformed)**

| Variable                                                           | Estimate              | 95% Lower confidence limit | 95% Upper confidence limit | p-value |
|--------------------------------------------------------------------|-----------------------|----------------------------|----------------------------|---------|
| Violent Crime rate*                                                | 0.171477 <sup>+</sup> | 0.043586                   | 0.299368                   | 0.009   |
| Proportion of residents non-Hispanic Black                         | 0.000104              | -0.0023                    | 0.002504                   | 0.933   |
| Proportion of residents Hispanic (any race)                        | 0.001551              | -0.00038                   | 0.003481                   | 0.115   |
| Proportion of residents other race <sup>‡</sup>                    | -0.00798              | -0.0159                    | -6.5E-05                   | 0.048   |
| Unemployment rate                                                  | 0.003555              | -0.00063                   | 0.007743                   | 0.096   |
| Vacant housing rate                                                | 3.41E-06              | 8.15E-07                   | 6.00E-06                   | 0.01    |
| Median Household Income                                            | 0.000908              | -0.003                     | 0.004815                   | 0.649   |
| Less than High School Education attainment rate                    | -0.00281              | -0.0062                    | 0.000593                   | 0.106   |
| Year 2000-2004                                                     | <b>Reference</b>      |                            |                            |         |
| Year 2005-2009                                                     | -0.23392              | -0.28776                   | -0.18008                   | <0.001  |
| Year 2010-2014                                                     | -0.272                | -0.34178                   | -0.20222                   | <0.001  |
| <b>Time-invariant variables</b>                                    |                       |                            |                            |         |
| Proportion of residents with health insurance coverage (2008-2012) | -0.00334              | -0.01164                   | 0.004964                   | 0.431   |
| <b>Quintile of residents per physician (2008)</b>                  |                       |                            |                            |         |
| Quintile 1                                                         | <b>Reference</b>      |                            |                            |         |
| Quintile 2                                                         | 0.114665              | -0.03124                   | 0.260574                   | 0.123   |
| Quintile 3                                                         | 0.024071              | -0.1057                    | 0.15384                    | 0.716   |
| Quintile 4                                                         | 0.051928              | -0.07966                   | 0.183515                   | 0.439   |
| Quintile 5                                                         | 0.029265              | -0.11828                   | 0.176811                   | 0.697   |

\* Included in model as log transformed variable. Rate is per 100,000 residents

† A 1% change in the variable is associated with a percent change in the outcome equal to the estimate value.

‡ Other race includes Asian, American Indian or Alaska Native, Native Hawaiian and Other Pacific Islander, 2 or more races, or some other race.
